# Supplementary material for: Spin-filter induced large magnetoresistance in 2D van der Waals magnetic tunnel junctions
Source: Royal Society of Chemistry journal article supplement (doi:10.1039/d0nr07290g), 2020-11-28
Supplement: d0nr07290g1.pdf [file d0nr07290g1.pdf]

# Spin-Filter induced Large Magnetoresistance in 2D van der Waals Magnetic junctions

*Wei Yang*<sup>1, ‡</sup>, *Yuan Cao*<sup>1, ‡</sup>, *Jiangchao Han*<sup>1, ‡</sup>, *Xiaoyang Lin*<sup>1, 2, \*</sup>, *Xinhe Wang*<sup>1</sup>,

*Guodong Wei*<sup>1</sup>, *Chen Lv*<sup>1</sup>, *Arnaud Bournel*<sup>3</sup>, *Weisheng Zhao*<sup>1, 2, \*</sup>

<sup>1</sup> Fert Beijing Research Institute, School of Microelectronics & Beijing Advanced  
Innovation Center for Big Data and Brain Computing, Beihang University, Beijing  
100191, China

<sup>2</sup> Beihang-Goertek Joint Microelectronics Institute, Qingdao Research Institute,  
Beihang University, Qingdao 266000, China

<sup>3</sup> Centre de Nanosciences et de Nanotechnologies, Université Paris-Saclay, CNRS  
UMR 9001, 91120 Palaiseau, France

\* E-mails: [weisheng.zhao@buaa.edu.cn](mailto:weisheng.zhao@buaa.edu.cn); [XYLin@buaa.edu.cn](mailto:XYLin@buaa.edu.cn)

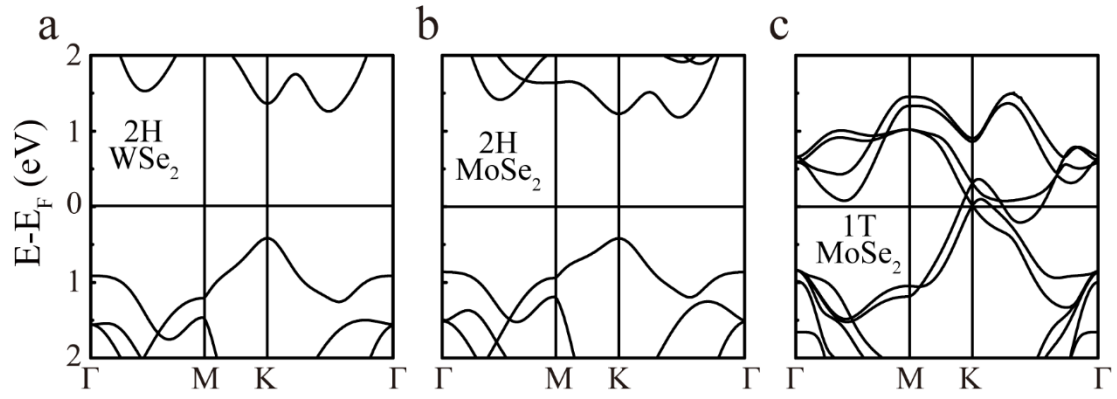

**Figure S1** The band structure of 2H WSe<sub>2</sub>, 2H MoSe<sub>2</sub> and 1T MoSe<sub>2</sub>.

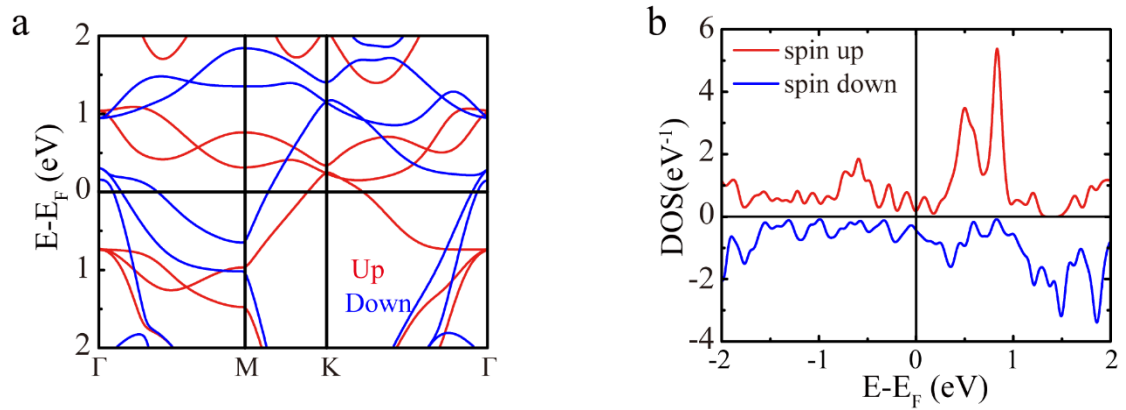

**Figure S2** The electronic property of 1T VSe<sub>2</sub>. a) The band structure of VSe<sub>2</sub>. b) The spin-resolved density of state (DOS) of VSe<sub>2</sub>.

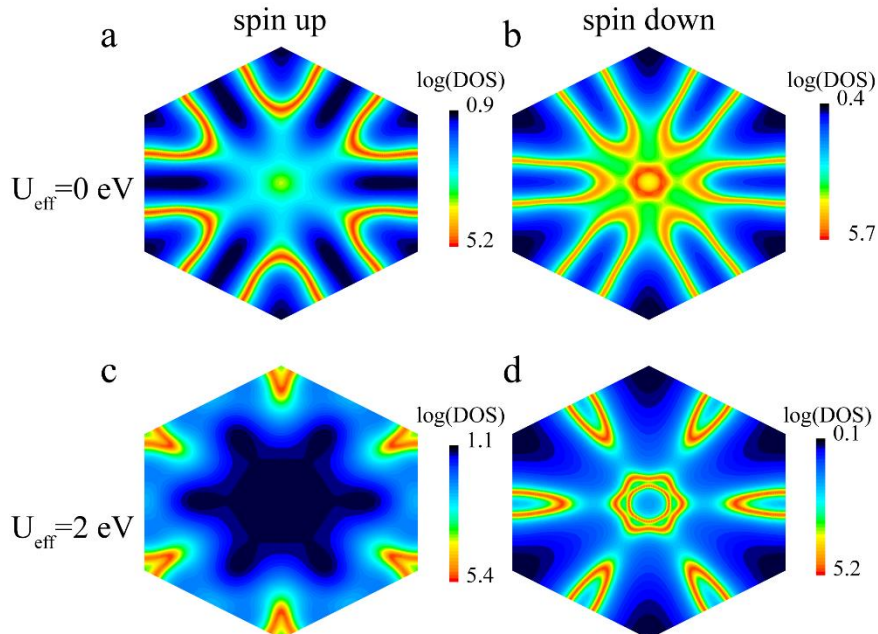

**Figure S3** The influence of Hubbard term on electronic property of 1T-VSe<sub>2</sub>. a & b) The spin up (a) and spin down (b) states with  $U_{\text{eff}}=0$  eV. c & d) The spin up (c) and spin down (d) states with  $U_{\text{eff}}=2$  eV.
